# Supplementary material for: Sensors and regulators of intracellular pH
Source: Springer Nature journal article supplement (doi:10.1038/nrm2820), 2009-12-09
Supplement: 41580_2010_BFnrm2820_MOESM10_ESM.pdf [file 41580_2010_BFnrm2820_MOESM10_ESM.pdf]

Supplementary information 1 (Table) | **Mammalian Alkali Cation/Proton Exchangers**

| Gene / common name | Tissue distribution                                 | Membrane location                                                  | Transport mode                                      | Functions                                                                                           | Murine/human pathophysiology                                                                                  | Refs           |
|--------------------|-----------------------------------------------------|--------------------------------------------------------------------|-----------------------------------------------------|-----------------------------------------------------------------------------------------------------|---------------------------------------------------------------------------------------------------------------|----------------|
| SLC9A1/NHE1        | ubiquitous                                          | • plasma membrane (basolateral in epithelia)                       | Na <sup>+</sup> /H <sup>+</sup>                     | • cytosolic pH<br>• cell volume<br>• fluid secretion<br>• cell shape, proliferation and migration   | • ataxia, seizures, postnatal lethal<br>• reduced parotid gland secretion                                     | 1-4            |
| SLC9A2/NHE2        | multiple tissues                                    | • plasma membrane; (apical in epithelia)                           | Na <sup>+</sup> /H <sup>+</sup>                     | • fluid secretion                                                                                   | • reduced viability of gastric parietal cells and loss of acid secretion<br>• reduced parotid gland secretion | 4, 5           |
| SLC9A3/NHE3        | kidney, intestines (other epithelia)                | • apical membrane recycling endosomes                              | Na <sup>+</sup> /H <sup>+</sup>                     | • Na <sup>+</sup> & HCO <sub>3</sub> <sup>-</sup> (re) absorption<br>• early endosome acidification | • diarrhea; acidotic; hypotensive;<br>• tubular proteinuria                                                   | 6-8            |
| SLC9A4/NHE4        | stomach kidney                                      | • basolateral membrane of certain epithelia                        | Na <sup>+</sup> /H <sup>+</sup>                     | • cytosolic pH<br>• fluid secretion                                                                 | • impaired gastric acid secretion                                                                             | 9, 10          |
| SLC9A5/NHE5        | brain (neurons) testis, spleen, and skeletal muscle | • plasma membrane<br>• recycling endosomes                         | Na <sup>+</sup> /H <sup>+</sup>                     | ?                                                                                                   | unknown                                                                                                       | 11-13          |
| SLC9A6/NHE6        | ubiquitous                                          | • early/recycling endosomes<br>• stereocilia of sensory hair cells | (Na <sup>+</sup> , K <sup>+</sup> )/H <sup>+</sup>  | • organellar pH                                                                                     | • X-linked metal retardation, epilepsy, ataxia                                                                | 14-17          |
| SLC9A7/NHE7        | ubiquitous                                          | • trans-Golgi network<br>• endosomes                               | (Na <sup>+</sup> , K <sup>+</sup> )/H <sup>+</sup>  | • organellar pH                                                                                     | unknown                                                                                                       | 18, 19         |
| SLC9A8/NHE8        | ubiquitous                                          | • endomembranes<br>• apical membranes in kidney                    | (Na <sup>+</sup> , K <sup>+</sup> )/H <sup>+</sup>  | • organellar pH                                                                                     | unknown                                                                                                       | 17, 20, 21     |
| SLC9A9/NHE9        | ubiquitous                                          | • recycling endosomes<br>• stereocilia of sensory hair cells       | (Na <sup>+</sup> , K <sup>+</sup> )/H <sup>+</sup>  | • organellar pH                                                                                     | • attention-deficit hyperactivity disorder<br>• autism-spectrum disorder                                      | 16, 17, 22, 23 |
| NHA1               | ubiquitous                                          | ?                                                                  | ?                                                   | ?                                                                                                   | unknown                                                                                                       | 24             |
| NHA2               | multiple tissues                                    | • plasma membrane<br>• inner mitochondrial membrane                | (Na <sup>+</sup> , Li <sup>+</sup> )/H <sup>+</sup> | ?                                                                                                   | unknown                                                                                                       | 24-27          |

- Bell, S.M. *et al.* Targeted disruption of the murine Nhe1 locus induces ataxia, growth retardation, and seizures. *Am.J.Physiol.* **276**, C788-C795 (1999).
- Cox, G.A. *et al.* Sodium/hydrogen exchanger gene defect in slow-wave epilepsy mutant mice. *Cell* **91**, 139-148 (1997).
- Meima, M.E., Mackley, J.R. & Barber, D.L. Beyond ion translocation: structural functions of the sodium-hydrogen exchanger isoform-1. *Curr.Opin.Nephrol.Hypertens.* **16**, 365-372 (2007).
- Park, K. *et al.* Defective fluid secretion and NaCl absorption in the parotid glands of Na<sup>+</sup>/H<sup>+</sup> exchanger-deficient mice. *J.Biol.Chem.* **276**, 27042-27050 (2001).
- Schultheis, P.J. *et al.* Targeted disruption of the murine Na<sup>+</sup>/H<sup>+</sup> exchanger isoform 2 gene causes reduced viability of gastric parietal cells and loss of net acid secretion. *J.Clin.Invest.* **101**, 1243-1253 (1998).
- Gekle, M. *et al.* NHE3 Na<sup>+</sup>/H<sup>+</sup> exchanger supports proximal tubular protein reabsorption in vivo. *Am.J.Physiol.Renal Physiol* **287**, F469-F473 (2004).
- Noonan, W.T. *et al.* Blood pressure maintenance in NHE3-deficient mice with transgenic expression of NHE3 in small intestine. *Am.J.Physiol.Regul.Integr.Comp Physiol* **288**, R685-R691 (2005).
- Schultheis, P.J. *et al.* Renal and intestinal absorptive defects in mice lacking the NHE3 Na<sup>+</sup>/H<sup>+</sup> exchanger. *Nature Genet.* **19**, 282-285 (1998).
- Gawenis, L.R. *et al.* Impaired Gastric Acid Secretion in Mice with a Targeted Disruption of the NHE4 Na<sup>+</sup>/H<sup>+</sup> Exchanger. *J.Biol.Chem.* **280**, 12781-12789 (2005).
- Peti-Peterdi, J. *et al.* Macula densa Na<sup>+</sup>/H<sup>+</sup> exchange activities mediated by apical NHE2 and basolateral NHE4 isoforms. *Am.J.Physiol.* **278**, F452-F463 (2000).
- Attapitaya, S., Park, K. & Melvin, J.E. Molecular cloning and functional expression of a rat Na<sup>+</sup>/H<sup>+</sup> exchanger (NHE5) highly expressed in brain. *J.Biol.Chem.* **274**, 4383-4388 (1999).
- Baird, N.R. *et al.* Molecular cloning, genomic organization, and functional expression of Na<sup>+</sup>/H<sup>+</sup> exchanger isoform 5 (NHE5) from human brain. *J.Biol.Chem.* **274**, 4377-4382 (1999).
- Szaszi, K. *et al.* Clathrin-mediated endocytosis and recycling of the neuron-specific Na<sup>+</sup>/H<sup>+</sup> exchanger NHE5 isoform: regulation by phosphatidylinositol 3'-kinase and the actin cytoskeleton. *J.Biol.Chem.* **277**, 42623-42632 (2002).
- Brett, C.L., Wei, Y., Donowitz, M. & Rao, R. Human Na<sup>+</sup>/H<sup>+</sup> exchanger isoform 6 is found in recycling endosomes of cells, not in mitochondria. *Am.J.Physiol.Cell Physiol.* **282**, C1031-C1041 (2002).
- Gilfillan, G.D. *et al.* SLC9A6 mutations cause X-linked mental retardation, microcephaly, epilepsy, and ataxia, a phenotype mimicking Angelman syndrome. *Am.J.Hum.Genet.* **82**, 1003-1010 (2008).
- Hill, J.K. *et al.* Vestibular hair bundles control pH with (Na<sup>+</sup>, K<sup>+</sup>)/H<sup>+</sup> exchangers NHE6 and NHE9. *J.Neurosci.* **26**, 9944-9955 (2006).
- Nakamura, N., Tanaka, S., Teko, Y., Mitsui, K. & Kanazawa, H. Four Na<sup>+</sup>/H<sup>+</sup> exchanger isoforms are distributed to Golgi and post-Golgi compartments and are involved in organelle pH regulation. *J.Biol.Chem.* **280**, 1561-1572 (2005).
- Lin, P.J. *et al.* Secretory carrier membrane proteins interact and regulate trafficking of the organellar (Na<sup>+</sup>, K<sup>+</sup>)/H<sup>+</sup> exchanger NHE7. *J.Cell Sci.* **118**, 1885-1897 (2005).
- Numata, M. & Orłowski, J. Molecular cloning and characterization of a novel (Na<sup>+</sup>, K<sup>+</sup>)/H<sup>+</sup> exchanger localized to the trans-Golgi network. *J Biol Chem* **276**, 17387-94 (2001).

## SUPPLEMENTARY INFORMATION

20. Goyal, S., Mentone, S. & Aronson, P.S. Immunolocalization of NHE8 in Rat Kidney. *Am.J.Physiol Renal Physiol* **288**, F530-F538 (2005).
21. Zhang, J. *et al.* Characterization of Na<sup>+</sup>/H<sup>+</sup> Exchanger NHE8 in Cultured Renal Epithelial Cells. *Am.J.Physiol Renal Physiol* **293**, F761-F766 (2007).
22. de Silva, M.G. *et al.* Disruption of a novel member of a sodium/hydrogen exchanger family and DOCK3 is associated with an attention deficit hyperactivity disorder-like phenotype. *J.Med.Genet.* **40**, 733-740 (2003).
23. Morrow, E.M. *et al.* Identifying autism loci and genes by tracing recent shared ancestry. *Science* **321**, 218-223 (2008).
24. Brett, C.L., Donowitz, M. & Rao, R. Evolutionary origins of eukaryotic sodium/proton exchangers. *Am.J.Physiol Cell Physiol* **288**, C223-C239 (2005).
25. Battaglino, R.A. *et al.* NHA-oc/NHA2: A mitochondrial cation-proton antiporter selectively expressed in osteoclasts. *Bone* **42**, 180-192 (2008).
26. Fuster, D.G. *et al.* Characterization of the sodium/hydrogen exchanger NHA2. *J.Am.Soc.Nephrol.* **19**, 1547-1556 (2008).
27. Xiang, M., Feng, M., Muend, S. & Rao, R. A human Na<sup>+</sup>/H<sup>+</sup> antiporter sharing evolutionary origins with bacterial NhaA may be a candidate gene for essential hypertension. *Proc.Natl.Acad.Sci.U.S.A* **104**, 18677-18681 (2007).
