# Supplementary material for: Sensors and regulators of intracellular pH
Source: Springer Nature journal article supplement (doi:10.1038/nrm2820), 2009-12-09
Supplement: 41580_2010_BFnrm2820_MOESM11_ESM.pdf [file 41580_2010_BFnrm2820_MOESM11_ESM.pdf]

Supplementary information 2 (Table) | **Mammalian Bicarbonate Transporters.**

| Gene/common name   | Tissue distribution/epithelial localization                                                                            | Transport mode                                                                                                                                                           | Murine null phenotype                                                                                                   | Refs     |
|--------------------|------------------------------------------------------------------------------------------------------------------------|--------------------------------------------------------------------------------------------------------------------------------------------------------------------------|-------------------------------------------------------------------------------------------------------------------------|----------|
| SLC4a1/AE1, Band 3 | Erythrocyte, kidney, heart/ <i>kAE1 Basolateral</i>                                                                    | Cl <sup>-</sup> /HCO <sub>3</sub> <sup>-</sup> exchange/ <i>electroneutral</i>                                                                                           | Hemolytic anemia in two independent mouse AE1 <sup>-/-</sup> lines, also seen in spontaneous bovine mutant.             | 1-3 4    |
| SLC4a2/AE2         | Widespread/ <i>Basolateral</i>                                                                                         | Cl <sup>-</sup> /HCO <sub>3</sub> <sup>-</sup> exchange/ <i>electroneutral</i>                                                                                           | Loss of stomach acid secretion, failed dentition; altered immune function.                                              | 5, 6 7   |
| SLC4a3/AE3         | Brain, heart, retina, pituitary, adrenal gland;<br><i>Non-epithelial</i>                                               | Cl <sup>-</sup> /HCO <sub>3</sub> <sup>-</sup> exchange / <i>electroneutral</i>                                                                                          | Inner retinal defects, similar to human vitreoretinal degeneration syndromes; sensitivity to chemical-induced seizures. | 8-10     |
| SLC4a4/NBCe1       | Pancreas, kidney, heart, cornea, prostate, colon, stomach, thyroid, brain/ <i>Basolateral</i>                          | Na <sup>+</sup> /HCO <sub>3</sub> <sup>-</sup> co-transport/ <i>electrogenic</i>                                                                                         | Metabolic acidosis, runting, splenomegaly, altered dentition, intestinal obstruction; death before weaning.             | 11 12-17 |
| SLC4a5/NBCe2       | Brain (especially prefrontal cortex), epididymis, cardiac muscle, smooth muscle, kidney, choroid plexus/ <i>Apical</i> | Na <sup>+</sup> /HCO <sub>3</sub> <sup>-</sup> co-transport/ <i>electrogenic</i>                                                                                         | No mouse model.                                                                                                         | 18-21    |
| SLC4a7/NBCn1       | Heart, kidney, skeletal muscle, smooth muscle, submandibular gland, pancreas, stomach/ <i>Basolateral</i>              | Na <sup>+</sup> /HCO <sub>3</sub> <sup>-</sup> co-transport/ <i>electroneutral</i>                                                                                       | Blindness and auditory defect.                                                                                          | 22 23-25 |
| SLC4a9             | Kidney, testis, pancreas, widespread/ <i>Apical</i>                                                                    | Na <sup>+</sup> /HCO <sub>3</sub> <sup>-</sup> co-transport/ <i>electroneutral</i>                                                                                       | No mouse model.                                                                                                         | 26-29    |
| SLC4a8/NDCBE       | Prefrontal cortex of brain, testis, cardiac myocytes, oocytes                                                          | Na <sup>+</sup> -dependent Cl <sup>-</sup> /HCO <sub>3</sub> <sup>-</sup> exchange and (electroneutral NBC: splice variant)/ <i>electroneutral</i>                       | No mouse model.                                                                                                         | 30-32    |
| SLC4a10/NBCn2      | Cardiac myocytes, neurons, kidney, uterus, adrenal cortex, choroid plexus/ <i>Basolateral</i>                          | Na <sup>+</sup> /HCO <sub>3</sub> <sup>-</sup> co-transport or Na <sup>+</sup> -dependent Cl <sup>-</sup> /HCO <sub>3</sub> <sup>-</sup> exchange/ <i>electroneutral</i> | Epileptic seizures, reduced brain ventricle volume 2° to choroid plexus defect.                                         | 33-36    |
| SLC26a3/DRA        | Colon, ileum, cardiac myocytes, eccrine sweat gland/ <i>Apical</i>                                                     | Cl <sup>-</sup> /HCO <sub>3</sub> <sup>-</sup> exchange/ <i>electroneutral</i>                                                                                           | High chloride diarrhea.                                                                                                 | 37-39    |
| SLC26a4/Pendrin    | Thyroid, inner ear, thyroid, kidney, prostate/ <i>Apical</i>                                                           | Cl <sup>-</sup> /HCO <sub>3</sub> <sup>-</sup> exchange/ <i>electrogenic</i>                                                                                             | Deafness with vestibular dysfunction; inner ear endolymph dilatation.                                                   | 40 41-43 |
| SLC26a6/PAT-1      | Kidney, heart, bronchial epithelium, pancreas, prostate, thymus, intestine/ <i>Apical</i>                              | Cl <sup>-</sup> /HCO <sub>3</sub> <sup>-</sup> exchange/ <i>electrogenic</i>                                                                                             | Calcium oxalate urolithiasis, hyperoxaluria, high plasma oxalate.                                                       | 44 45-47 |
| SLC26a7            | Thyroid, kidney, stomach, retina, olfactory epithelium/ <i>Basolateral</i>                                             | Cl <sup>-</sup> /HCO <sub>3</sub> <sup>-</sup> exchange/ <i>electrogenic</i>                                                                                             | No mouse model.                                                                                                         | 48-50    |
| SLC26a9            | Salivary gland, heart, brain, stomach, trachea, kidney/ <i>Apical</i>                                                  | Cl <sup>-</sup> /HCO <sub>3</sub> <sup>-</sup> exchange/ <i>electrogenic</i>                                                                                             | No mouse model.                                                                                                         | 51, 52   |

- Southgate, C.D., Chishti, A.H., Mitchell, B., Yi, S.J. & Palek, J. Targeted disruption of the murine erythroid band 3 gene results in spherocytosis and severe haemolytic anaemia despite a normal membrane skeleton. *Nat. Genet.* **14**, 227-230 (1996).
- Peters, L.L. *et al.* Anion exchanger 1 (band 3) is required to prevent erythrocyte membrane surface loss but not to form the membrane skeleton. *Cell* **86**, 917-927 (1996).
- Inaba, M. *et al.* Defective anion transport and marked spherocytosis with membrane instability caused by hereditary total deficiency of red cell band 3 in cattle due to a nonsense mutation. *J. Clin. Invest.* **97**, 1804-1817 (1996).
- Kopito, R.R. & Lodish, H.F. Primary structure and transmembrane orientation of the murine anion exchange protein. *Nature* **316**, 234-238 (1985).
- Gawenis, L.R. *et al.* Mice with a targeted disruption of the AE2 Cl<sup>-</sup>/HCO<sub>3</sub><sup>-</sup> exchanger are achlorhydric. *J Biol Chem* **279**, 30531-30539 (2004).
- Salas, J.T. *et al.* Ae2a,b-deficient mice develop antimitochondrial antibodies and other features resembling primary biliary cirrhosis. *Gastroenterology* **134**, 1482-1493 (2008).
- Alper, S.L., Kopito, R.R., Libresco, S.M. & Lodish, H.F. Cloning and characterization of a murine Band 3-related cDNA from kidney and a lymphoid cell line. *J. Biol. Chem.* **263**, 17092-17099 (1988).
- Hentschke, M. *et al.* Mice with a targeted disruption of the Cl<sup>-</sup>/HCO<sub>3</sub><sup>-</sup> exchanger AE3 display a reduced seizure threshold. *Mol Cell Biol* **26**, 182-191 (2006).
- Alvarez, B.V. *et al.* Blindness results from deficiency in AE3 chloride/bicarbonate exchanger. *PLoS ONE* **2**, e839 (2007).
- Kudrycki, K.E., Newman, P.R. & Shull, G.E. cDNA cloning and tissue distribution of mRNAs for two proteins that are related to the Band 3 Cl<sup>-</sup>/HCO<sub>3</sub><sup>-</sup> exchanger. *J. Biol. Chem.* **265**, 462-471 (1990).
- Gawenis, L.R. *et al.* Colonic anion secretory defects and metabolic acidosis in mice lacking the NBC1 Na<sup>+</sup>/HCO<sub>3</sub><sup>-</sup> cotransporter. *J. Biol. Chem.* **282**, 9042-9052 (2007).
- Burnham, C.E., Amlal, H., Wang, Z., Shull, G.E. & Soleimani, M. Cloning and functional expression of a human kidney Na<sup>+</sup>:HCO<sub>3</sub><sup>-</sup> cotransporter. *J. Biol. Chem.* **272**, 19111-19114 (1997).
- Romero, M.F., Hediger, M.A., Boulpaep, E.L. & Boron, W.F. Expression cloning and characterization of a renal electrogenic Na<sup>+</sup>/HCO<sub>3</sub><sup>-</sup> cotransporter. *Nature* **387**, 409-413 (1997).
- Abuladze, N. *et al.* Molecular cloning, chromosomal localization, tissue distribution, and functional expression of the human pancreatic sodium bicarbonate cotransporter. *J. Biol. Chem.* **273**, 17689-17695 (1998).
- Choi, I., Romero, M.F., Khandoudi, N., Bril, A. & Boron, W.F.

- W.F. Cloning and characterization of a human electrogenic Na<sup>+</sup>-HCO<sub>3</sub><sup>-</sup> cotransporter isoform (hhNBC). *Am. J. Physiol.* **276**, C576-584 (1999).
16. Bevensee, M.O., Schmitt, B.M., Choi, I., Romero, M.F. & Boron, W.F. An electrogenic Na<sup>+</sup>-HCO<sub>3</sub><sup>-</sup> cotransporter (NBC) with a novel COOH-terminus, cloned from rat brain. *Am. J. Physiol.* **278**, C1200-C1211 (2000).
  17. Sun, X.C. & Bonanno, J.A. Identification and cloning of the Na/HCO<sub>3</sub><sup>-</sup> cotransporter (NBC) in human corneal endothelium. *Exp Eye Res* **77**, 287-295 (2003).
  18. Pushkin, A. *et al.* Cloning, characterization and chromosomal assignment of NBC4, a new member of the sodium bicarbonate cotransporter family. *Biochim Biophys Acta* **1493**, 215-218. (2000).
  19. Sassani, P. *et al.* Functional characterization of NBC4: a new electrogenic sodium-bicarbonate cotransporter. *Am J Physiol Cell Physiol* **282**, C408-416 (2002).
  20. Virkki, L.V., Wilson, D.A., Vaughan-Jones, R.D. & Boron, W.F. Functional characterization of human NBC4 as an electrogenic Na<sup>+</sup>-HCO<sub>3</sub><sup>-</sup> cotransporter (NBCe2). *Am J Physiol Cell Physiol* **282**, C1278-1289 (2002).
  21. Xu, J. *et al.* Expression of the Na<sup>+</sup>-HCO<sub>3</sub><sup>-</sup> cotransporter NBC4 in rat kidney and characterization of a novel NBC4 variant. *Am J Physiol Renal Physiol* **284**, F41-50 (2003).
  22. Bok, D. *et al.* Blindness and auditory impairment caused by loss of the sodium bicarbonate cotransporter NBC3. *Nat Genet* **34**, 313-319 (2003).
  23. Ishibashi, K., Sasaki, S. & Marumo, F. Molecular cloning of a new sodium bicarbonate cotransporter cDNA from human retina. *Biochem. Biophys. Res. Commun.* **246**, 535-538 (1998).
  24. Pushkin, A. *et al.* Cloning, tissue distribution, genomic organization, and functional characterization of NBC3, a new member of the sodium bicarbonate cotransporter family. *J. Biol. Chem.* **274**, 16569-16575 (1999).
  25. Choi, I., Aalkjaer, C., Boulpaep, E.L. & Boron, W.F. An electroneutral sodium/bicarbonate cotransporter NBCn1 and associated sodium channel. *Nature* **405**, 571-575 (2000).
  26. Tsuganezawa, H. *et al.* A new member of the HCO<sub>3</sub><sup>-</sup> transporter superfamily is an apical anion exchanger of beta-intercalated cells in the kidney. *J Biol Chem* **276**, 8180-8189 (2001).
  27. Parker, M.D., Ourmozdi, E.P. & Tanner, M.J. Human BTR1, a New Bicarbonate Transporter Superfamily Member and Human AE4 from Kidney. *Biochem Biophys Res Commun* **282**, 1103-1109. (2001).
  28. Romero, M.F., Fulton, C.M. & Boron, W.F. The SLC4 family of HCO<sub>3</sub><sup>-</sup> transporters. *Pflugers Arch* **14**, 14 (2004).
  29. Parker, M.D., Boron, W.F. & Tanner, M.J. Characterization of human "AE4" as an electroneutral sodium bicarbonate cotransporter. *FASEB J* **16**, A796 (2002).
  30. Romero, M.F. *et al.* Cloning and characterization of a Na<sup>+</sup> driven anion exchanger (NDAE1): a new bicarbonate transporter. *J. Biol. Chem.* **275**, 24552-24559 (2000).
  31. Grichtchenko, I. *et al.* Cloning, characterization, and chromosomal mapping of a human electroneutral Na<sup>+</sup>-driven Cl<sup>-</sup>/HCO<sub>3</sub><sup>-</sup> exchanger. *J Biol Chem* **276**, 8358-8363 (2001).
  32. Wang, Z. *et al.* Mouse Na<sup>+</sup>: HCO<sub>3</sub><sup>-</sup> cotransporter isoform NBC-3 (kNBC-3): cloning, expression, and renal distribution. *Kidney Int* **59**, 1405-1414 (2001).
  33. Jacobs, S. *et al.* Mice with targeted Slc4a10 gene disruption have small brain ventricles and show reduced neuronal excitability. *Proc Natl Acad Sci U S A* **105**, 311-316 (2008).
  34. Wang, C.Z., Yano, H., Nagashima, K. & Seino, S. The Na<sup>+</sup>-driven Cl<sup>-</sup>/HCO<sub>3</sub><sup>-</sup> exchanger: Cloning, tissue distribution, and functional characterization. *J Biol Chem* **275**, 35486-35490 (2000).
  35. Praetorius, J., Nejsum, L.N. & Nielsen, S. A SCL4A10 gene product maps selectively to the basolateral plasma membrane of choroid plexus epithelial cells. *Am J Physiol Cell Physiol* **286**, C601-610 (2004).
  36. Parker, M.D. *et al.* Characterization of human SLC4A10 as an electroneutral Na/HCO<sub>3</sub> cotransporter (NBCn2) with Cl<sup>-</sup> self-exchange activity. *J Biol Chem* **283**, 12777-12788 (2008).
  37. Schweinfest, C.W. *et al.* slc26a3 (dra)-deficient mice display chloride-losing diarrhea, enhanced colonic proliferation, and distinct up-regulation of ion transporters in the colon. *J Biol Chem* **281**, 37962-37971 (2006).
  38. Melvin, J.E., Park, K., Richardson, L., Schultheis, P.J. & Shull, G.E. Mouse down-regulated in adenoma (DRA) is an intestinal Cl<sup>-</sup>/HCO<sub>3</sub><sup>-</sup> exchanger and is up-regulated in colon of mice lacking the NHE3 Na<sup>+</sup>/H<sup>+</sup> exchanger. *J. Biol. Chem.* **274**, 22855-22861 (1999).
  39. Barmeyer, C. *et al.* Characteristics of rat downregulated in adenoma (rDRA) expressed in HEK 293 cells. *Pflugers Arch* **454**, 441-450 (2007).
  40. Everett, L.A. *et al.* Targeted disruption of mouse Pds provides insight about the inner-ear defects encountered in Pendred syndrome. *Hum Mol Genet* **10**, 153-161 (2001).
  41. Scott, D.A., Wang, R., Kreman, T.M., Sheffield, V.C. & Karnishki, L.P. The Pendred syndrome gene encodes a chloride-iodide transport protein. *Nat Genet* **21**, 440-443 (1999).
  42. Soleimani, M. *et al.* Pendrin: an apical Cl<sup>-</sup>/OH<sup>-</sup>/HCO<sub>3</sub><sup>-</sup> exchanger in the kidney cortex. *Am J Physiol Renal Physiol* **280**, F356-364. (2001).
  43. Shcheynikov, N. *et al.* Slc26a4 functions as an electroneutral Cl<sup>-</sup>/I<sup>-</sup>/HCO<sub>3</sub><sup>-</sup> exchanger: Role of Slc26a4 and Slc26a6 in I<sup>-</sup> and HCO<sub>3</sub><sup>-</sup> secretion and in regulation of CFTR in the parotid duct. *J Physiol In Press* (2008).
  44. Jiang, Z. *et al.* Calcium oxalate urolithiasis in mice lacking anion transporter Slc26a6. *Nat Genet* **38**, 474-478 (2006).
  45. Waldegger, S. *et al.* Cloning and characterization of SLC26A6, a novel member of the solute carrier 26 gene family. *Genomics* **72**, 43-50 (2001).
  46. Wang, Z., Petrovic, S., Mann, E. & Soleimani, M. Identification of an apical Cl<sup>-</sup>/HCO<sub>3</sub><sup>-</sup> exchanger in the small intestine. *Am J Physiol Gastrointest Liver Physiol* **282**, G573-579 (2002).
  47. Xie, Q., Welch, R., Mercado, A., Romero, M.F. & Mount, D.B. Molecular characterization of the murine Slc26a6 anion exchanger: functional comparison with Slc26a1. *Am J Physiol Renal Physiol* **283**, F826-838 (2002).
  48. Lohi, H. *et al.* Functional characterization of three novel tissue-specific anion exchangers: SLC26A7, A8 and A9. *J Biol Chem* **277**, 14246-14254 (2002).
  49. Vincourt, J.B., Jullien, D., Kossida, S., Amalric, F. & Girard, J.P. Molecular Cloning of SLC26A7, a Novel Member of the SLC26 Sulfate/Anion Transporter Family, from High Endothelial Venules and Kidney. *Genomics* **79**, 249-256 (2002).
  50. Petrovic, S. *et al.* Identification of a basolateral Cl<sup>-</sup>/HCO<sub>3</sub><sup>-</sup> exchanger specific to gastric parietal cells. *Am J Physiol Gastrointest Liver Physiol* **284**, G1093-1103 (2003).
  51. Xu, J. *et al.* SLC26A9 is expressed in gastric surface epithelial cells, mediates Cl<sup>-</sup>/HCO<sub>3</sub><sup>-</sup> exchange, and is inhibited by NH<sub>4</sub><sup>+</sup>. *Am J Physiol Cell Physiol* **289**, C493-505 (2005).
  52. Dorwart, M.R., Shcheynikov, N., Wang, Y., Stippec, S. & Muallem, S. SLC26A9 is a Cl<sup>-</sup> channel regulated by the WNK kinases. *J Physiol* **584**, 333-345 (2007).
