# Supplementary material for: Sensors and regulators of intracellular pH
Source: Springer Nature journal article supplement (doi:10.1038/nrm2820), 2009-12-09
Supplement: 41580_2010_BFnrm2820_MOESM12_ESM.pdf [file 41580_2010_BFnrm2820_MOESM12_ESM.pdf]

Supplementary information 3 (Table) | **Examples of pH-sensitive targets and functional outcomes**

| pH-sensitive targets                                            | Effect of pH                                                                                                                                                                                                                                                                  | Refs   |
|-----------------------------------------------------------------|-------------------------------------------------------------------------------------------------------------------------------------------------------------------------------------------------------------------------------------------------------------------------------|--------|
| <b>Ion Homeostasis</b>                                          |                                                                                                                                                                                                                                                                               |        |
| Ca <sup>2+</sup> -ATPases                                       | Plasma membrane and sarco(endo)plasmic reticulum Ca <sup>2+</sup> -ATPase activities are steeply pH dependent, with decreased activity occurring at alkaline or acidic pH values away from the optimum, and regulate cellular calcium homeostasis                             | 1      |
| Ryanodine receptors                                             | Ryanodine receptors are sarcoplasmic reticulum Ca <sup>2+</sup> release channels that are inhibited by acid pH (6.9), leading to a two-fold increase in SR Ca <sup>2+</sup> stores.                                                                                           | 2, 3   |
| Kir1.1 K <sup>+</sup> Channels (ROMK)                           | Intracellular acidification inhibits ROMK, an Inward-rectifier ATP-regulated K <sup>+</sup> channel present at the apical membranes of the distal nephron, and serves as a mechanism for preserving K <sup>+</sup> levels during metabolic acidosis.                          | 4, 5   |
| N-methyl-D-aspartate (NMDA) receptor channels                   | Transient increases in extracellular H <sup>+</sup> generated by excitatory amino acids inhibits further calcium influx via certain neurotransmitter receptor channels, such as the NMDA receptor, thereby acting as a feedback mechanism to modulate synaptic transmission.  | 6, 7   |
| Acid-sensing ion channels (ASIC) Channels                       | ASIC channels are Na <sup>+</sup> channels that are activated by extracellular acidification and play important roles in nociception, mechanosensation, and synaptic plasticity.                                                                                              | 8-11   |
| TASK K <sup>+</sup> Channels                                    | H <sup>+</sup> -dependent inhibition of TASK channels, a two-pore domain K <sup>+</sup> channel, can depolarize and increase excitability of specific neurons in the brainstem and may contribute to ventilatory and arousal reflexes associated with extracellular acidosis. | 12, 13 |
| Voltage-gated cation channels                                   | Voltage-gated Na <sup>+</sup> , K <sup>+</sup> and Ca <sup>2+</sup> channels are differentially sensitive to extracellular or intracellular acidosis and modulate neuronal excitability.                                                                                      | 14-16  |
| <b>Signal Transduction / Cell Communication</b>                 |                                                                                                                                                                                                                                                                               |        |
| H <sup>+</sup> -gated G-protein coupled receptors OGR1 and GPR4 | Activation of OGR1 and GPR4 by extracellular H <sup>+</sup> causes coupled phospholipase C activation and downstream ER Ca <sup>2+</sup> channel opening.                                                                                                                     | 17, 18 |
| Soluble-adenylate cyclase                                       | Activated in the presence of HCO <sup>3-</sup> (bicarbonate sensor), leading to increased cAMP production.                                                                                                                                                                    | 19     |
| Connexins-36 and -43                                            | Gap junctions (neuronal and cardiomyocyte) close outside physiological pH range, limiting intercellular electrical connectivity.                                                                                                                                              | 20, 21 |
| Bax inhibitor-1 (BI-1)                                          | Intracellular acidification activates BI-1 which increases Ca <sup>2+</sup> leakage from the ER, induces Bax recruitment to mitochondria, followed by increased cytochrome c release and apoptosis.                                                                           | 22     |
| <b>Cell Shape, Motility &amp; Contractility</b>                 |                                                                                                                                                                                                                                                                               |        |
| Cofilin                                                         | Increases in intracellular pH activate the actin filament severing activity of cofilin, leading to increased actin free barbed ends required for actin filament remodelling and membrane protrusions at the leading edge of motile cells.                                     | 23, 24 |
| Villin                                                          | Alkalinization increases villin-dependent bundling of actin filaments                                                                                                                                                                                                         | 25     |
| Gelsolin                                                        | Acidic pH promotes gelsolin actin-severing activity                                                                                                                                                                                                                           | 26, 27 |
| Na <sup>+</sup> /H <sup>+</sup> exchanger NHE1                  | Activation of NHE1 is permissive for cell migration; NHE1 accumulates at leading edge of lamellipodia.                                                                                                                                                                        | 28-30  |
| Cathepsin B and Hyaluronidase-2                                 | Localized secretion of H <sup>+</sup> into extracellular space activates proteases involved in degradation of extracellular matrix tumour cell invasion.                                                                                                                      | 31     |
| Troponin C                                                      | Acidic pH reduces the affinity of troponin C for Ca <sup>2+</sup> and decreases myofilament contractility                                                                                                                                                                     | 32, 33 |
| <b>Metabolism</b>                                               |                                                                                                                                                                                                                                                                               |        |
| Phosphofructokinase                                             | Inhibited by acidic pH; major control point for glycolysis                                                                                                                                                                                                                    | 34, 35 |
| <b>Vesicle Trafficking</b>                                      |                                                                                                                                                                                                                                                                               |        |
| V-ATPase a2-subunit                                             | Association of the guanine nucleotide-exchange factor ARNO with the V-ATPase a2-subunit was dependent on endosomal acidification and subsequent recruitment of coat proteins necessary for vesicle traffic between early and late endosomes.                                  | 36     |

- Lytton, J., Westlin, M., Burk, S.E., Shull, G.E. & MacLennan, D.H. Functional comparisons between isoforms of the sarcoplasmic or endoplasmic reticulum family of calcium pumps. *J Biol Chem* **267**, 14483-9 (1992).
- Choi, H.S., Trafford, A.W., Orchard, C.H. & Eisner, D.A. The effect of acidosis on systolic Ca<sup>2+</sup> and sarcoplasmic reticulum calcium content in isolated rat ventricular myocytes. *J Physiol* **529 Pt 3**, 661-8 (2000).
- Xu, L., Mann, G. & Meissner, G. Regulation of cardiac Ca<sup>2+</sup> release channel (ryanodine receptor) by Ca<sup>2+</sup>, H<sup>+</sup>, Mg<sup>2+</sup>, and adenine nucleotides under normal and simulated ischemic conditions. *Circ.Res.* **79**, 1100-1109 (1996).
- Rapedius, M. et al. Structural and functional analysis of the putative pH sensor in the Kir1.1 (ROMK) potassium channel. *EMBO Rep.* **7**, 611-616 (2006).
- Schulte, U. & Fakler, B. Gating of inward-rectifier K<sup>+</sup> channels by intracellular pH. *Eur J Biochem* **267**, 5837-41 (2000).
- Kashiwagi, K., Fukuchi, J., Chao, J., Igarashi, K. & Williams, K. An aspartate residue in the extracellular loop of the N-methyl-D-aspartate receptor controls sensitivity to spermine and protons. *Mol.Pharmacol.* **49**, 1131-1141 (1996).
- Tang, C.M., Dichter, M. & Morad, M. Modulation of the N-methyl-D-aspartate channel by extracellular H<sup>+</sup>. *Proc.Natl.Acad.Sci.U.S.A* **87**, 6445-6449 (1990).
- Deval, E. et al. ASIC3, a sensor of acidic and primary inflammatory pain. *EMBO J.* **27**, 3047-3055 (2008).
- Waldmann, R. et al. H<sup>+</sup>-gated cation channels. *Ann.N.Y.Acad.Sci.* **868**, 67-76 (1999).
- Li, T., Yang, Y. & Canessa, C.M. Interaction of the aromatics Tyr-72/Trp-288 in the interface of the extracellular and transmembrane domains is essential for proton gating of acid-sensing ion channels. *J.Biol. Chem.* **284**, 4689-4694 (2009).
- Lingueglia, E. Acid-sensing ion channels in sensory perception. *J Biol Chem* **282**, 17325-9 (2007).
- Duprat, F., Lauritzen, I., Patel, A. & Honore, E. The TASK background K2P channels: chemo- and nutrient sensors. *Trends Neurosci.* **30**, 573-580 (2007).
- Duprat, F. et al. TASK, a human background K<sup>+</sup> channel to sense external pH variations near physiological pH. *EMBO J.* **16**, 5464-5471 (1997).
- DeVries, S.H. Exocytosed protons feedback to suppress the Ca<sup>2+</sup> current in mammalian cone photoreceptors. *Neuron* **32**, 1107-1117 (2001).
- Tombaugh, G.C. & Somjen, G.G. Effects of extracellular pH on voltage-gated Na<sup>+</sup>, K<sup>+</sup> and Ca<sup>2+</sup> currents in isolated rat CA1 neurons. *J.Physiol.(Lond.)* **493**, 719-732 (1996).
- Tombaugh, G.C. & Somjen, G.G. Differential sensitivity

- to intracellular pH among high- and low-threshold  $\text{Ca}^{2+}$  currents in isolated rat CA1 neurons [published errata appear in *J Neurophysiol* 1997 May;77(5):following table of contents and 1997 Jun;77(6):2856]. *J Neurophysiol.* **77**, 639-653 (1997).
17. Huang, W.C., Swietach, P., Vaughan-Jones, R.D., Anson, O. & Glitsch, M.D. Extracellular acidification elicits spatially and temporally distinct  $\text{Ca}^{2+}$  signals. *Curr Biol* **18**, 781-5 (2008).
  18. Ludwig, M.G. et al. Proton-sensing G-protein-coupled receptors. *Nature* **425**, 93-8 (2003).
  19. Chen, Y. et al. Soluble adenyl cyclase as an evolutionarily conserved bicarbonate sensor. *Science* **289**, 625-8 (2000).
  20. Ek-Vitorin, J.F. et al. pH regulation of connexin43: Molecular analysis of the gating particle. *Biophys.J.* **71**, 1273-1284 (1996).
  21. Gonzalez-Nieto, D. et al. Regulation of neuronal connexin-36 channels by pH. *Proc Natl Acad Sci U S A* **105**, 17169-74 (2008).
  22. Kim, H.R. et al. Bax Inhibitor-1 Is a pH-dependent regulator of  $\text{Ca}^{2+}$  channel activity in the endoplasmic reticulum. *J Biol Chem.* **283**, 15946-15955 (2008).
  23. Frantz, C. et al. Cofilin is a pH sensor for actin free barbed end formation: role of phosphoinositide binding. *J Cell Biol.* **183**, 865-879 (2008).
  24. Pope, B.J., Zierler-Gould, K.M., Kuhne, R., Weeds, A.G. & Ball, L.J. Solution structure of human cofilin: actin binding, pH sensitivity, and relationship to actin-depolymerizing factor. *J Biol Chem* **279**, 4840-8 (2004).
  25. Grey, M.J. et al. Characterizing a partially folded intermediate of the villin headpiece domain under non-denaturing conditions: contribution of His41 to the pH-dependent stability of the N-terminal subdomain. *J Mol Biol* **355**, 1078-94 (2006).
  26. Lin, K.M., Wenegieme, E., Lu, P.J., Chen, C.S. & Yin, H.L. Gelsolin binding to phosphatidylinositol 4,5-bisphosphate is modulated by calcium and pH. *J Biol Chem.* **272**, 20443-20450 (1997).
  27. Sun, H.Q., Yamamoto, M., Mejillano, M. & Yin, H.L. Gelsolin, a multifunctional actin regulatory protein. *J Biol Chem* **274**, 33179-82 (1999).
  28. Denker, S.P. & Barber, D.L. Cell migration requires both ion translocation and cytoskeletal anchoring by the Na-H exchanger NHE1. *J Cell Biol.* **159**, 1087-1096 (2002).
  29. Hayashi, H. et al.  $\text{Na}^+/\text{H}^+$  exchange and pH regulation in the control of neutrophil chemokinesis and chemotaxis. *Am J Physiol Cell Physiol* **294**, C526-34 (2008).
  30. Stuwe, L. et al. pH dependence of melanoma cell migration: protons extruded by NHE1 dominate protons of the bulk solution. *J Physiol* **585**, 351-360 (2007).
  31. Bourguignon, L.Y., Singleton, P.A., Diedrich, F., Stern, R. & Gilad, E. CD44 interaction with  $\text{Na}^+/\text{H}^+$  exchanger (NHE1) creates acidic microenvironments leading to hyaluronidase-2 and cathepsin B activation and breast tumor cell invasion. *J Biol Chem* **279**, 26991-7007 (2004).
  32. Solaro, R.J., el-Saleh, S.C. & Kentish, J.C.  $\text{Ca}^{2+}$ , pH and the regulation of cardiac myofilament force and ATPase activity. *Mol Cell Biochem.* **89**, 163-167 (1989).
  33. Parsons, B. et al. The effect of pH on the  $\text{Ca}^{2+}$  affinity of the  $\text{Ca}^{2+}$  regulatory sites of skeletal and cardiac troponin C in skinned muscle fibres. *J Muscle Res. Cell Motil.* **18**, 599-609 (1997).
  34. Erecinska, M., Deas, J. & Silver, I.A. The effect of pH on glycolysis and phosphofructokinase activity in cultured cells and synaptosomes. *J Neurochem.* **65**, 2765-2772 (1995).
  35. Mansour, T.E. & Ahlfors, C.E. Studies on heart phosphofructokinase. Some kinetic and physical properties of the crystalline enzyme. *J Biol Chem.* **243**, 2523-2533 (1968).
  36. Hurtado-Lorenzo, A. et al. V-ATPase interacts with ARNO and Arf6 in early endosomes and regulates the protein degradative pathway. *Nat Cell Biol.* **8**, 124-136 (2006).
